# Supplementary material for: Long-term treatment outcomes of pediatric blepharokeratoconjunctivitis without systemic antibiotics
Source: Research Square preprint supplement (doi:10.21203/rs.3.rs-7154264/v1), 2025-08-27
Supplement: Supplementary file 1 [file 2689890c8aad26272dda188c.docx]

**Online Supplement**

**Treatment outcomes of paediatric blepharokeratoconjunctivitis without systemic antibiotics**

Authors: Haryung Park, Young Joon Choi

**List of materials included**

Supplemental Figure 3

Supplemental Table 1


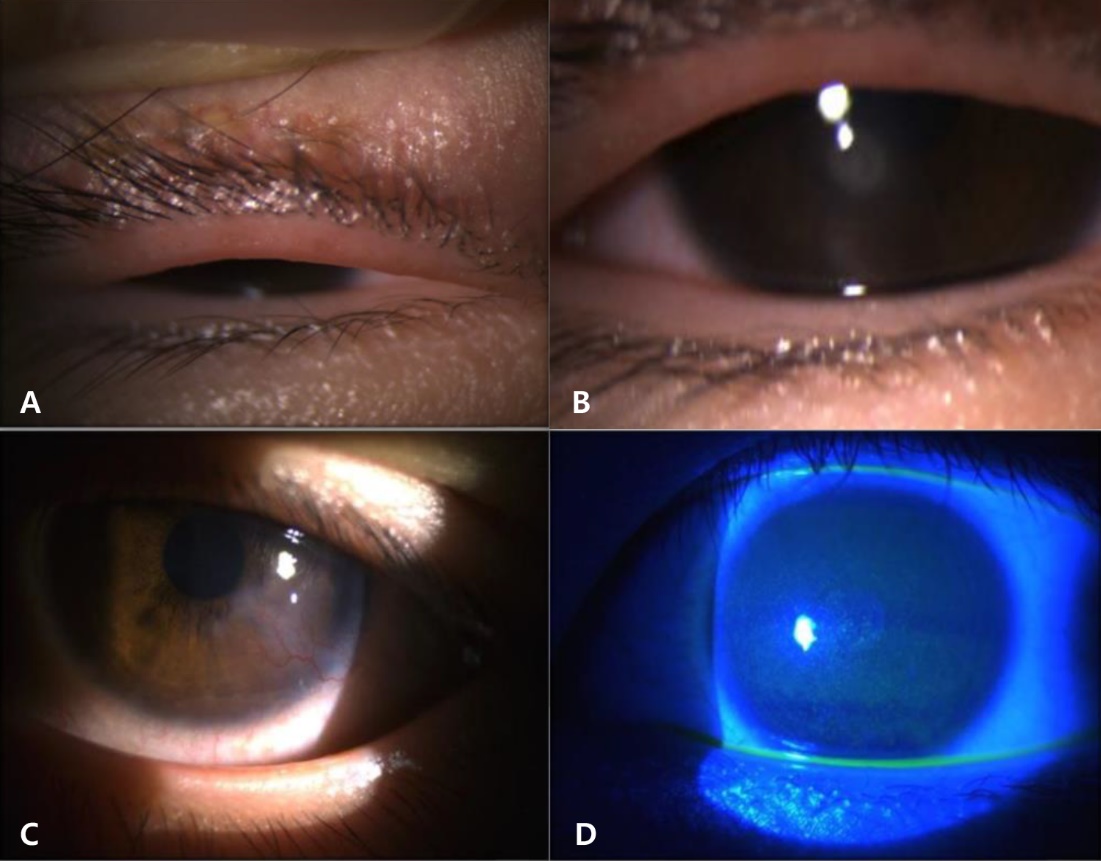


**Supplemental Figure 1.** Clinical signs seen in pediatric blepharokeratoconjunctivitis (PBKC). (A) Meibomitis. (B) Corneal inflammatory cellular infiltration. (C) Superficial corneal neovascularisation. (D) Superficial punctate keratopathy.


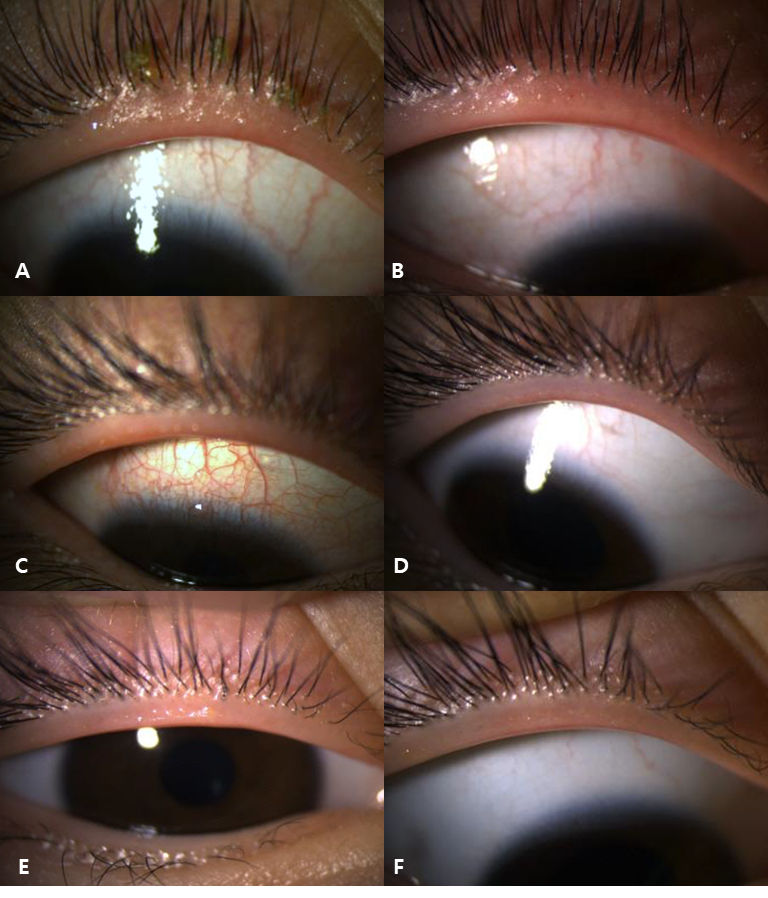


**Supplemental Figure 2.** Pre- and posttreatment changes in the eyelids in the patients with pediatric blepharokeratoconjunctivitis (PBKC)

A-B. The eyelid of 14-year-old male (Case 5) before (A) and 1 year after treatment (B).

C-D: The eyelid of 13-year-old female (Case 8) before (C) and 1 year after treatment (D).

E-F: The eyelid of 7-year-old female (Case 15) before (F) and 9 months after treatment (G).


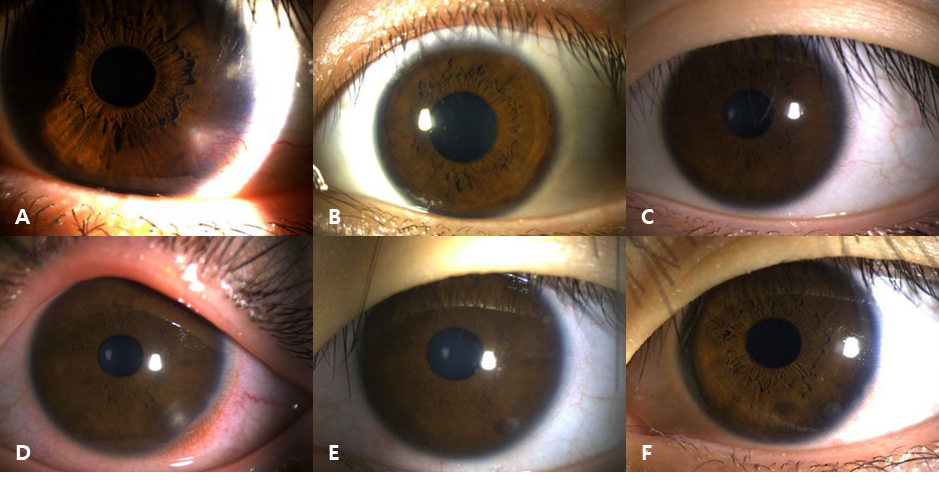


**Supplemental Figure 3**. Pre- and posttreatment changes in corneal phlyctenulosis in the patients with pediatric blepharokeratoconjunctivitis (PBKC)

A-C: The cornea of a 17-year-old female (Case 6) before treatment (A), 3 months after treatment (B), and 1 year 8 months after treatment (C)

D-F: The cornea of a 12-year-old female (Case 21) before treatment (D), 1 month after treatment (E), and 3 months after treatment (F)

**Supplemental Table 1: Patient characteristics**

| Case number | Mean age (years) | Mean F/U duration (months) | Sex | Laterality | History of chalazia | Dermatologic rosacea | Meibomian gland abnormality | Corneal infiltrates | Corneal NV | Phlycten type |
| --- | --- | --- | --- | --- | --- | --- | --- | --- | --- | --- |
| 1 | 14 | 19 | F | U | - | - | + | + | + | + |
| 2 | 5 | 6 | M | B | + | - | + | + | + | - |
| 3 | 13 | 5 | F | B | - | - | + | + | + | + |
| 4 | 8 | 6 | F | B | + | - | + | + | - | - |
| 5 | 14 | 12 | M | U | - | - | + | + | + | - |
| 6 | 17 | 20 | F | B | + | - | + | + | + | + |
| 7 | 14 | 7 | M | B | + | - | + | + | + | - |
| 8 | 13 | 19 | F | B | - | - | + | + | + | + |
| 9 | 8 | 17 | F | U | + | - | + | + | + | - |
| 10 | 12 | 11 | M | B | + | - | + | + | - | - |
| 11 | 12 | 12 | F | B | + | - | + | + | + | - |
| 12 | 16 | 6 | F | U | - | - | + | + | + | - |
| 13 | 15 | 11 | F | U | + | - | - | + | - | - |
| 14 | 6 | 11 | M | U | - | - | + | + | - | - |
| 15 | 7 | 9 | F | U | + | - | + | + | - | - |
| 16 | 10 | 10 | M | U | - | - | + | + | + | - |
| 17 | 11 | 10 | F | U | - | - | + | + | + | - |
| 18 | 5 | 10 | F | U | + | - | - | + | + | - |
| 19 | 11 | 8 | F | B | + | - | + | + | + | + |
| 20 | 2 | 3 | F | U | + | - | + | + | - | - |
| 21 | 12 | 3 | F | U | - | - | - | + | + | + |

Abbreviations: F/U, follow up; NV, neovascularisation; F, female; M, male; U, unilateral; B, bilateral
